# Supplementary material for: Allergens Induce the Release of Lactoferrin by Neutrophils from Asthmatic Patients
Source: PubMed Central journal article supplement (PMC4619071; doi:10.1371/journal.pone.0141278), 2015-10-21
Supplement: pone.0141278.s001.pdf [file pone.0141278.s001.pdf]

S1 Table. Demographic characteristics of the study groups.

|                                   | Healthy      | Intermittent<br>Asthma | Mild<br>Persistent<br>Asthma | Moderate<br>Persistent<br>Asthma | Severe<br>Persistent<br>Asthma |
|-----------------------------------|--------------|------------------------|------------------------------|----------------------------------|--------------------------------|
| n                                 | 17           | 17                     | 17                           | 17                               | 17                             |
| Age (yrs.)                        | 35 (18-36)   | 34 (19-34)             | 37 (20-45)                   | 42 (38-48)                       | 52 (47-62)                     |
| Sex (M/F)                         | 9/8          | 7/10                   | 9/8                          | 5/12                             | 6/11                           |
| Atopic                            | 0            | 17                     | 17                           | 17                               | 17                             |
| FEV <sub>1</sub><br>(% predicted) | 100 (95-104) | 101(98-104)            | 88 (80-96)                   | 82 (79-90)                       | 58 (50-64)                     |
| Lactoferrin<br>(ng/ml)            | 119±6        | 501±21                 | 584±23                       | 762±46                           | 2293±788                       |
